# Supplementary material
Source: PubMed Central journal article supplement (PMC6764417)
Supplement: NIHMS1536786-supplement-Supplemental_Figure_7.pdf [file NIHMS1536786-supplement-Supplemental_Figure_7.pdf]

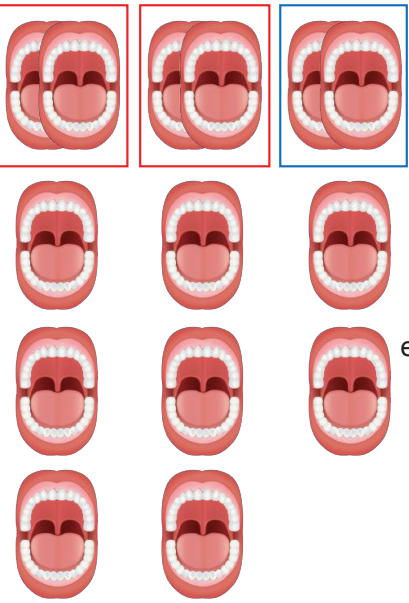

Homologs of small gene originate from 14 samples of 11 individuals

Taxonomic classification of encoding contigs

| Origin of Contig | Taxonomy                      | Individual | Transmembrane? |
|------------------|-------------------------------|------------|----------------|
| Sample 1         | Unclassified                  | 1          | Y              |
| Sample 2         | Unclassified                  | 1          | Y              |
| Sample 3         | Unclassified                  | 2          | Y              |
| Sample 4         | Unclassified                  | 2          | Y              |
| Sample 5         | <i>Actinomyces naeslundii</i> | 3          | Y              |
| Sample 6         | <i>Pepy6virus</i>             | 4          | Y              |
| Sample 7         | Unclassified                  | 5          | Y              |
| Sample 8         | Unclassified                  | 6          | Y              |
| Sample 9         | Unclassified                  | 7          | Y              |
| Sample 10        | Unclassified                  | 8          | Y              |
| Sample 11        | Unclassified                  | 9          | Y              |
| Sample 12        | Unclassified                  | 10         | Y              |
| Sample 13        | Unclassified                  | 11         | Y              |
| Sample 14        | Unclassified                  | 11         | Y              |
