# Supplementary material
Source: PubMed Central journal article supplement (PMC6764417)

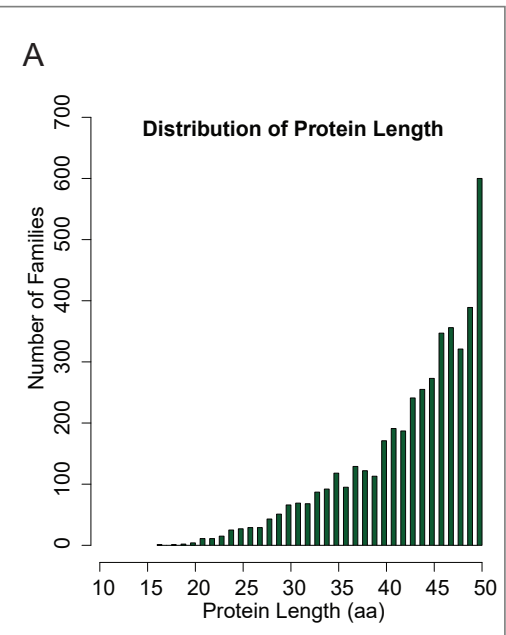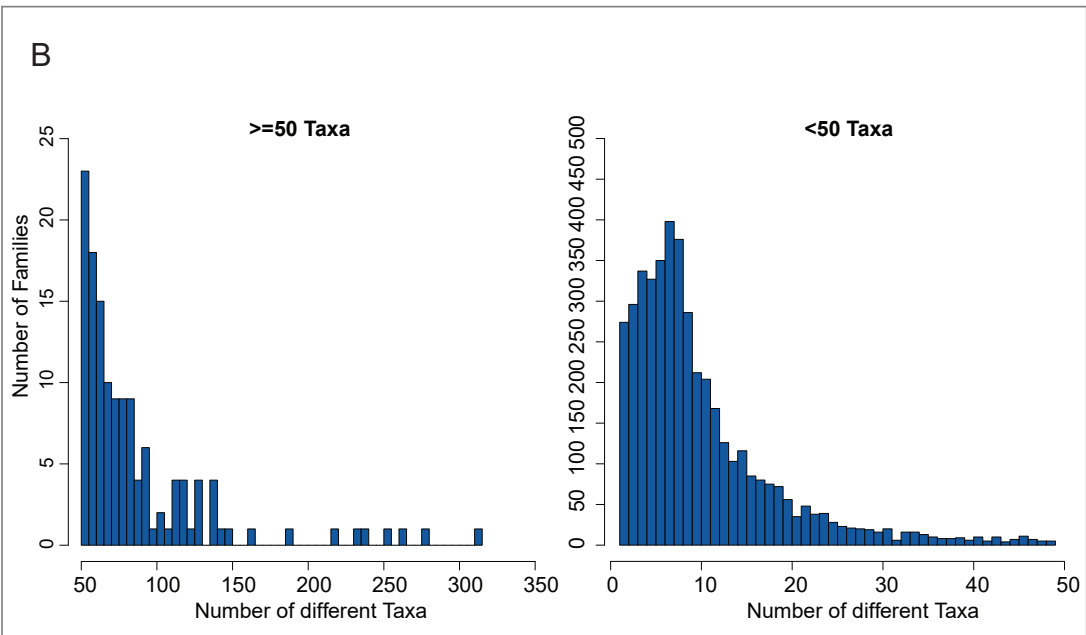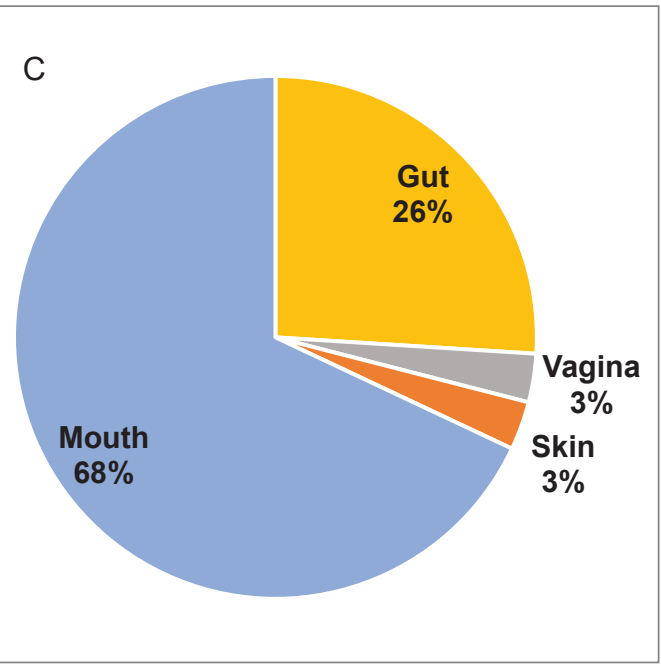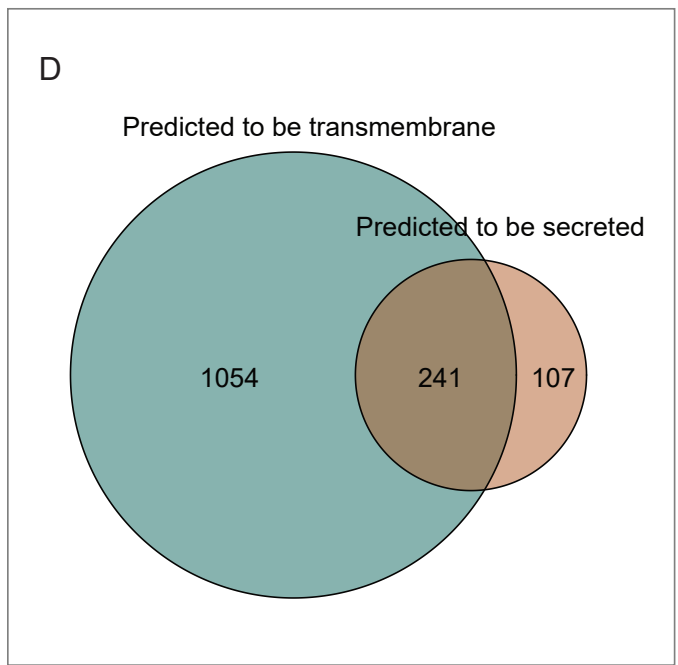

Supplement: NIHMS1536786-supplement-Supplemental_Figure_1.pdf [file NIHMS1536786-supplement-Supplemental_Figure_1.pdf]

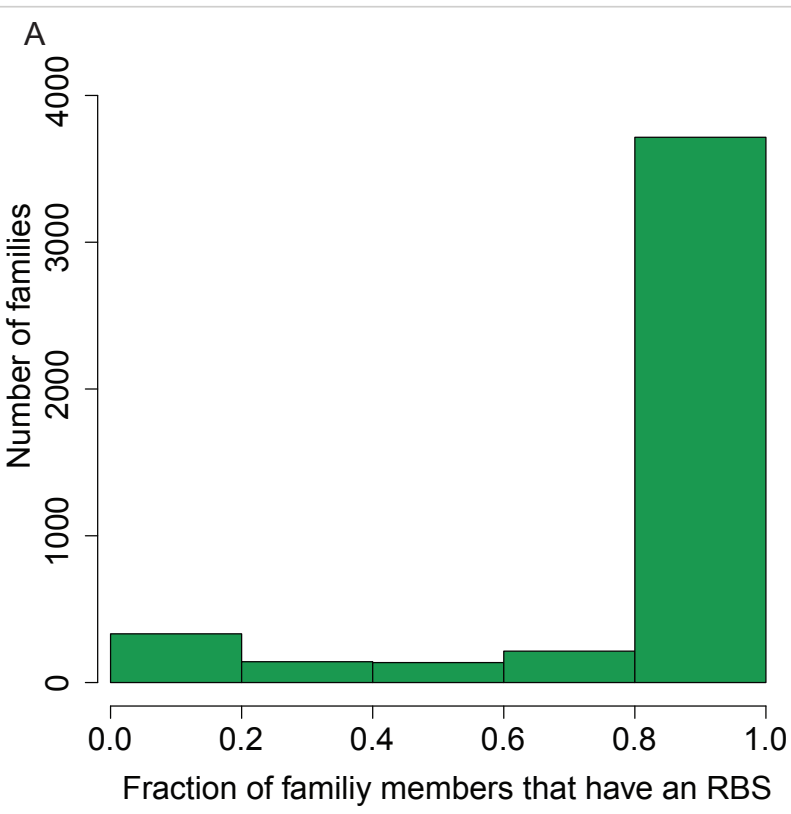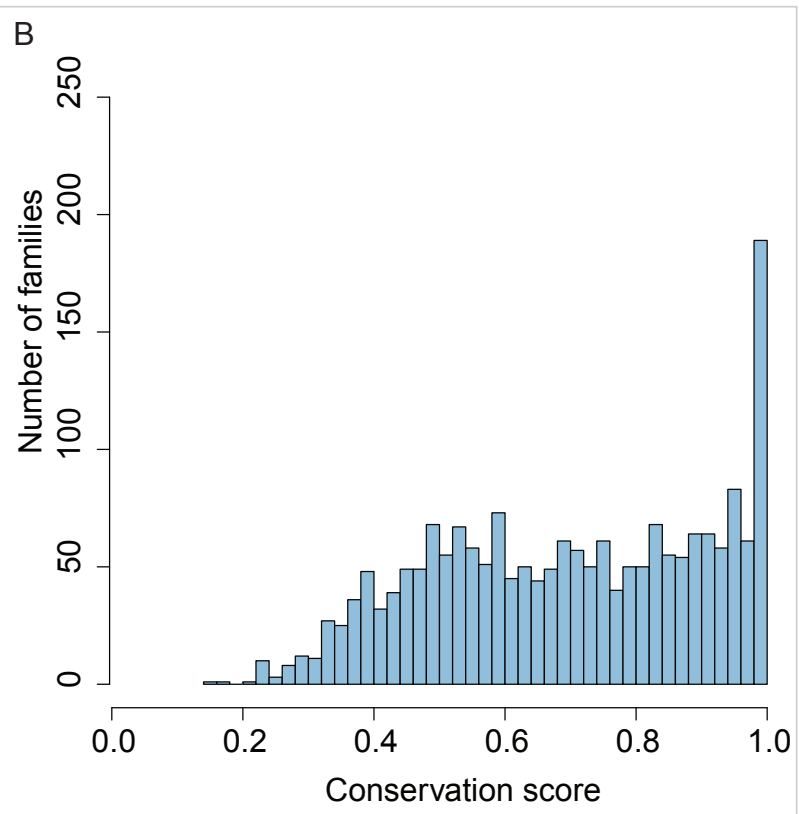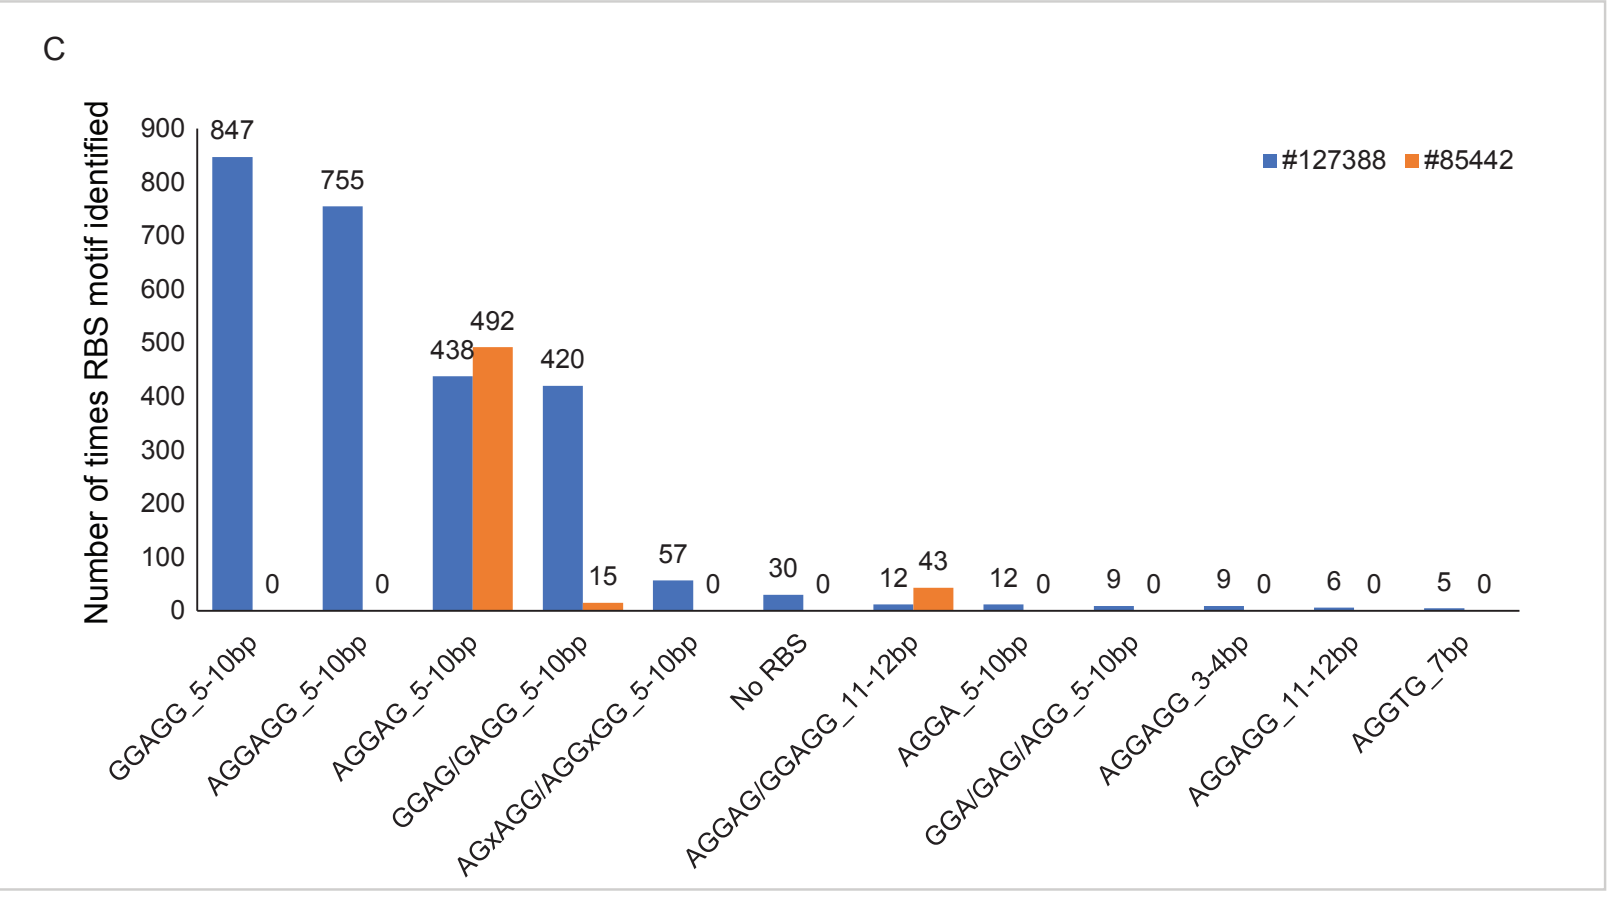

Supplement: NIHMS1536786-supplement-Supplemental_Figure_2.pdf [file NIHMS1536786-supplement-Supplemental_Figure_2.pdf]

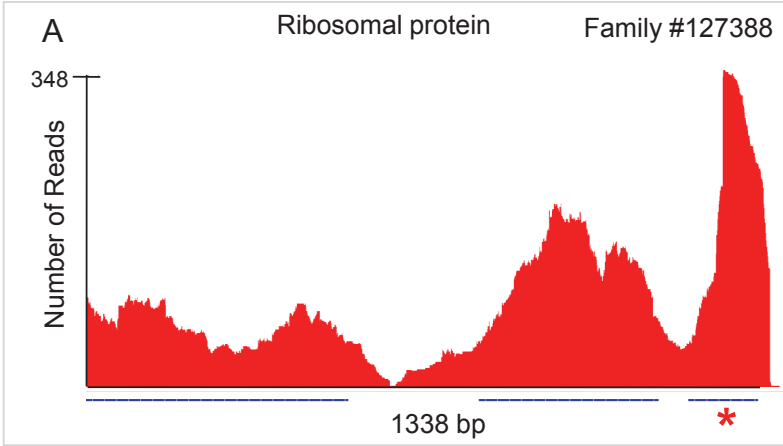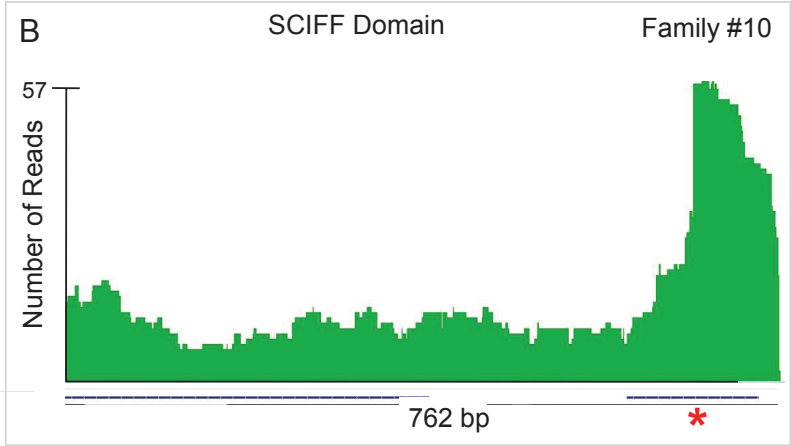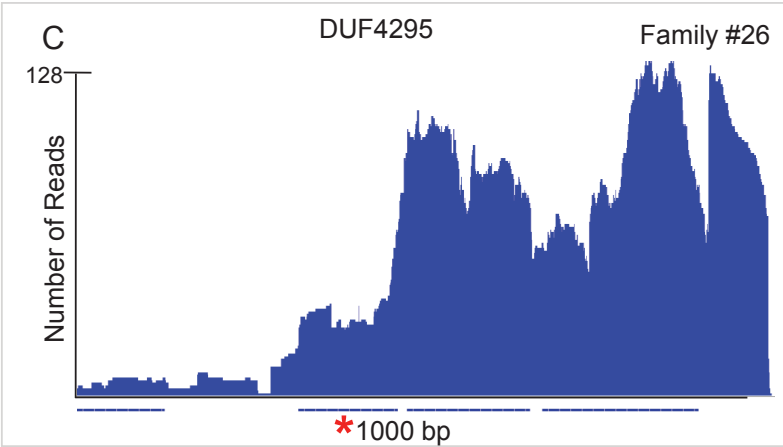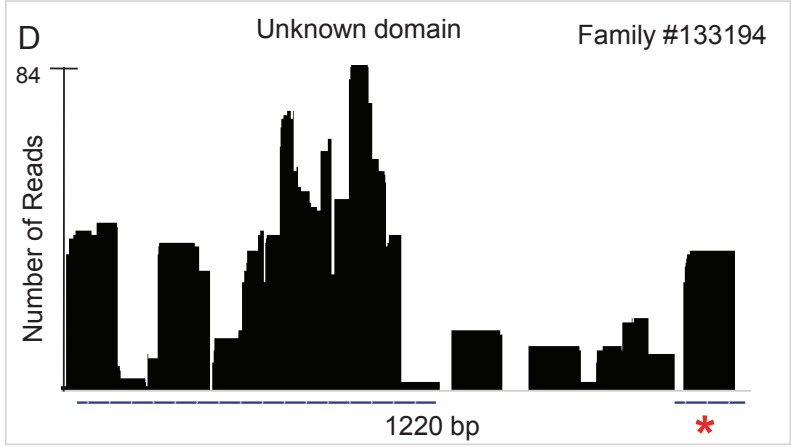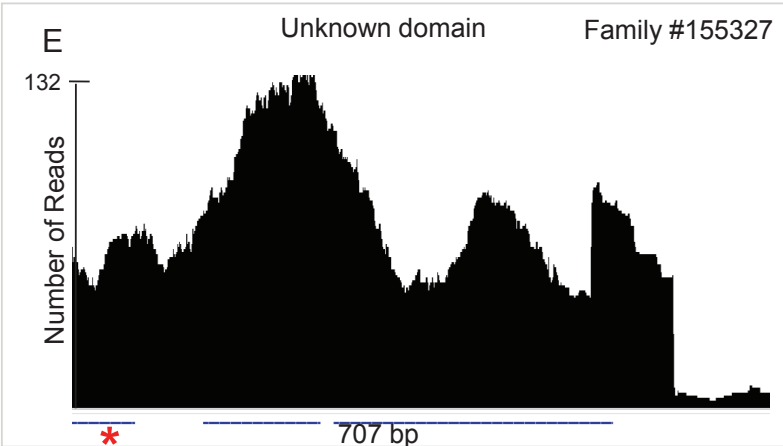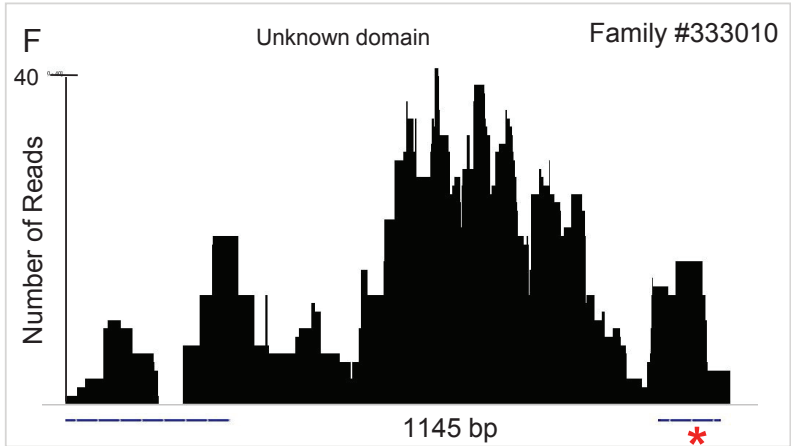

Supplement: NIHMS1536786-supplement-Supplemental_Figure_3.pdf [file NIHMS1536786-supplement-Supplemental_Figure_3.pdf]

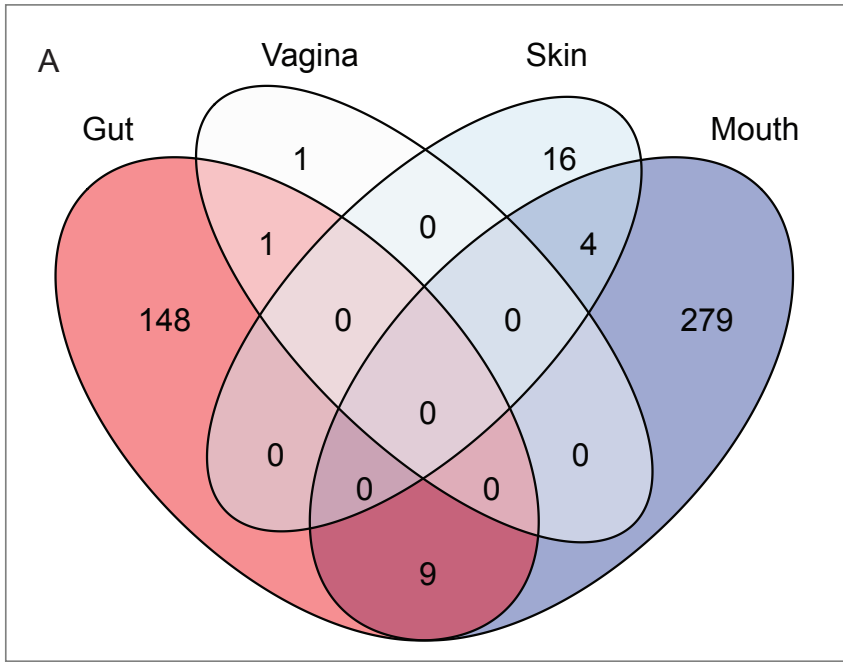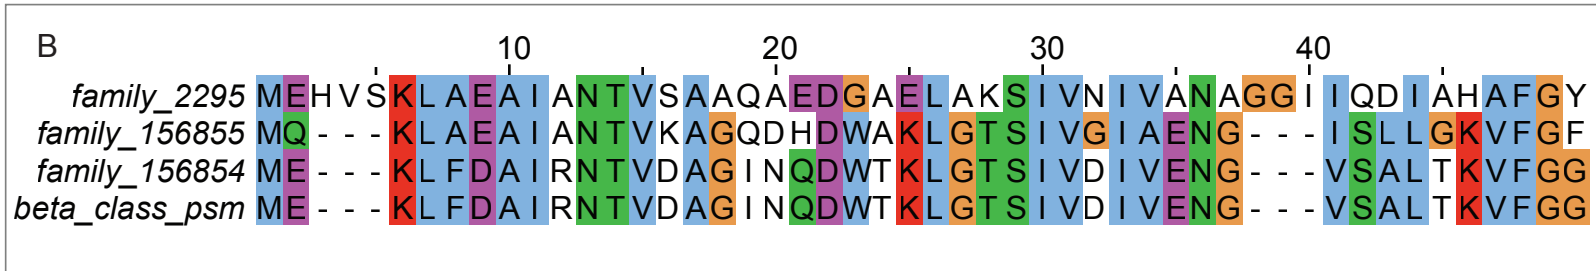

Supplement: NIHMS1536786-supplement-Supplemental_Figure_4.pdf [file NIHMS1536786-supplement-Supplemental_Figure_4.pdf]

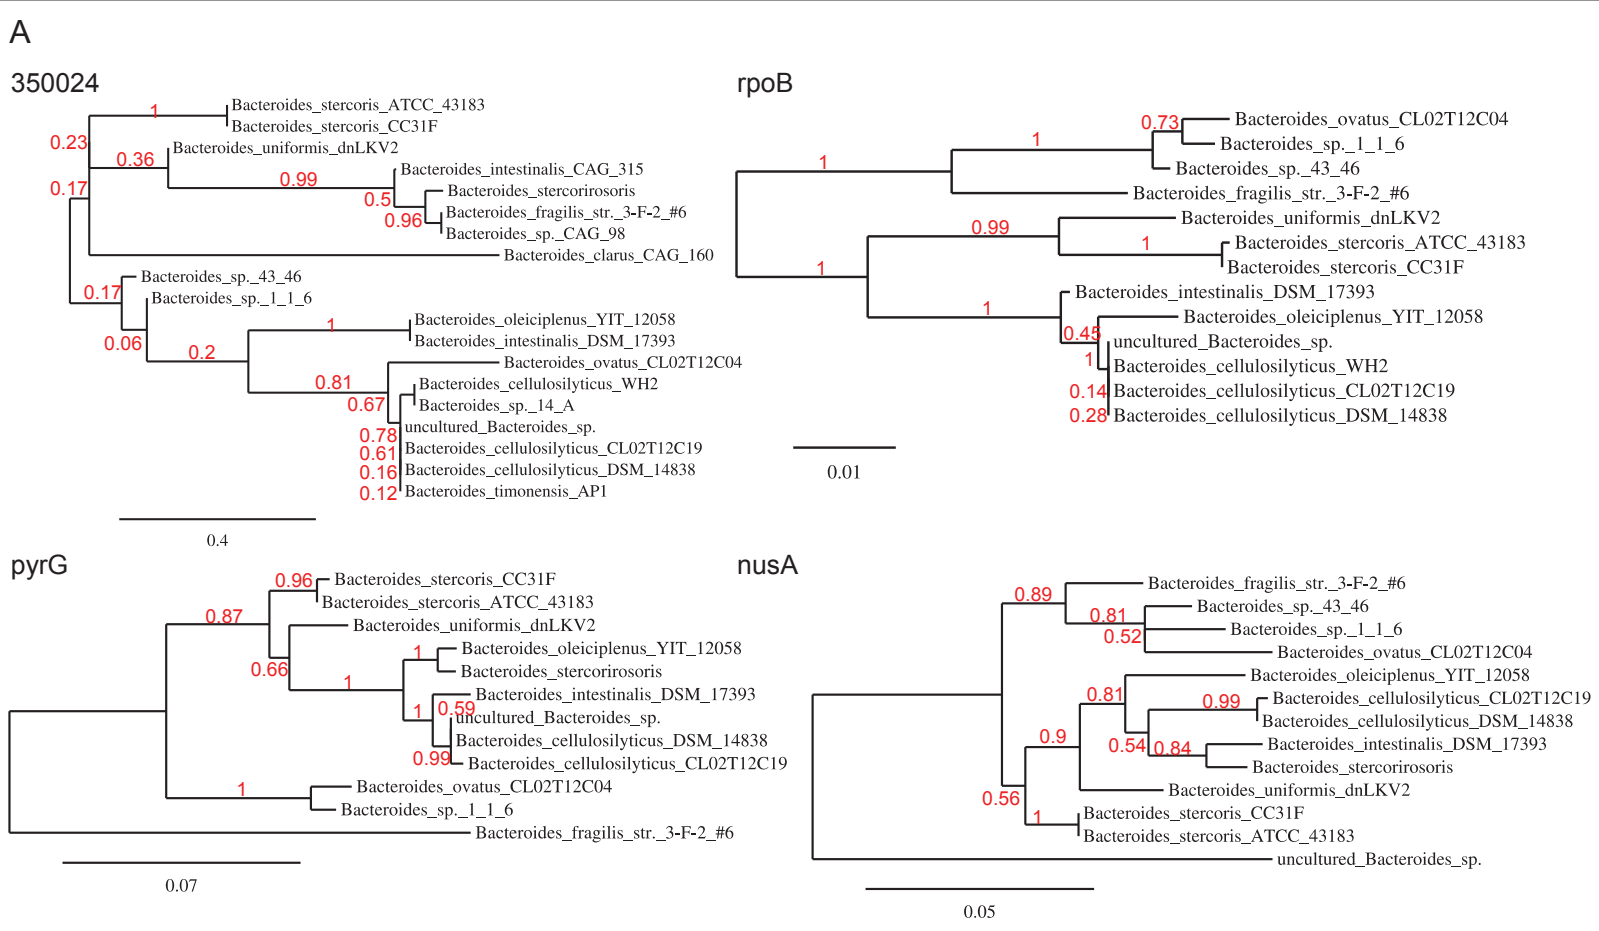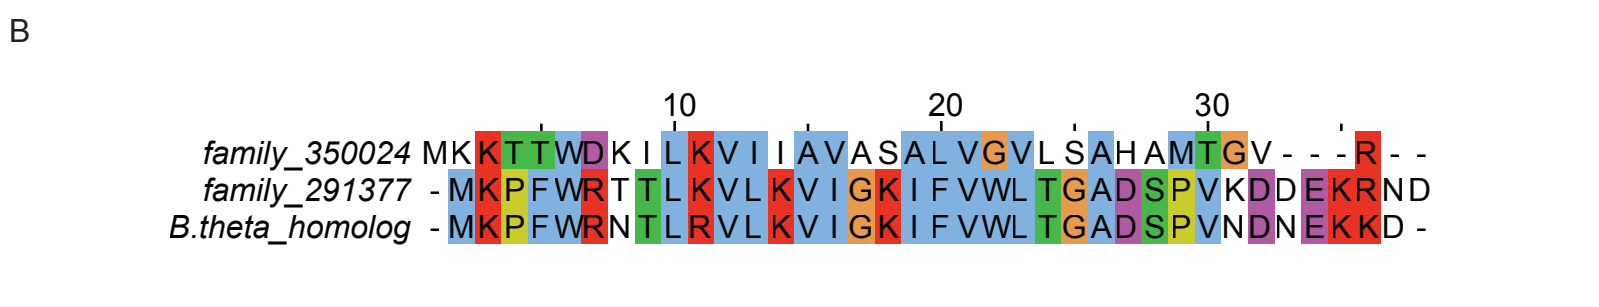

Supplement: NIHMS1536786-supplement-Supplemental_Figure_5.pdf [file NIHMS1536786-supplement-Supplemental_Figure_5.pdf]

A

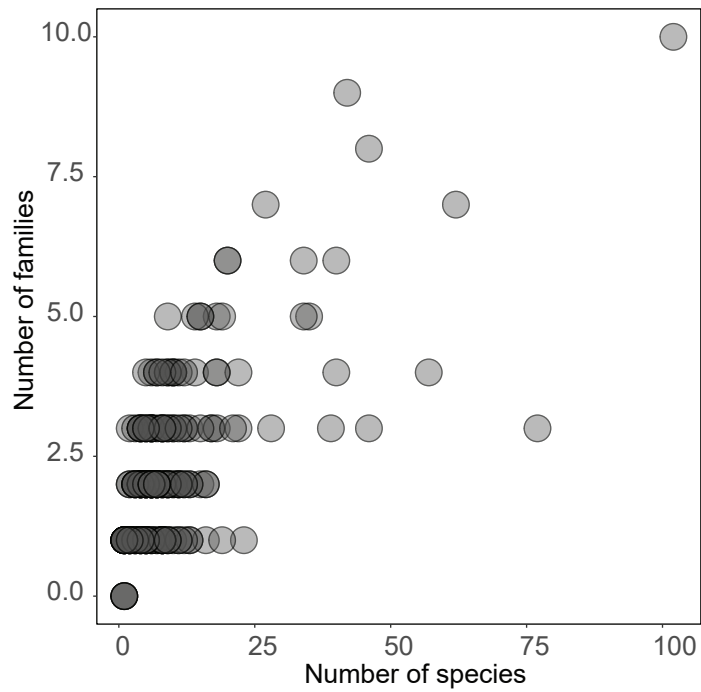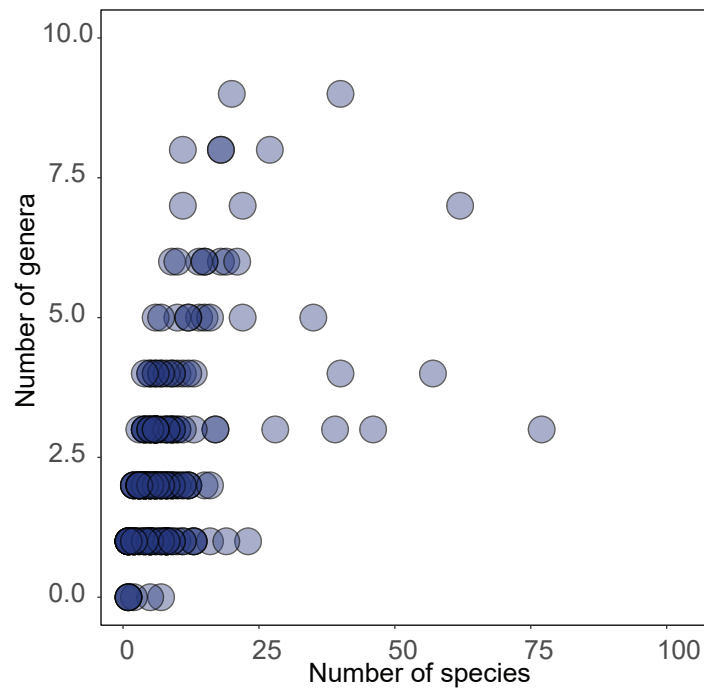

B

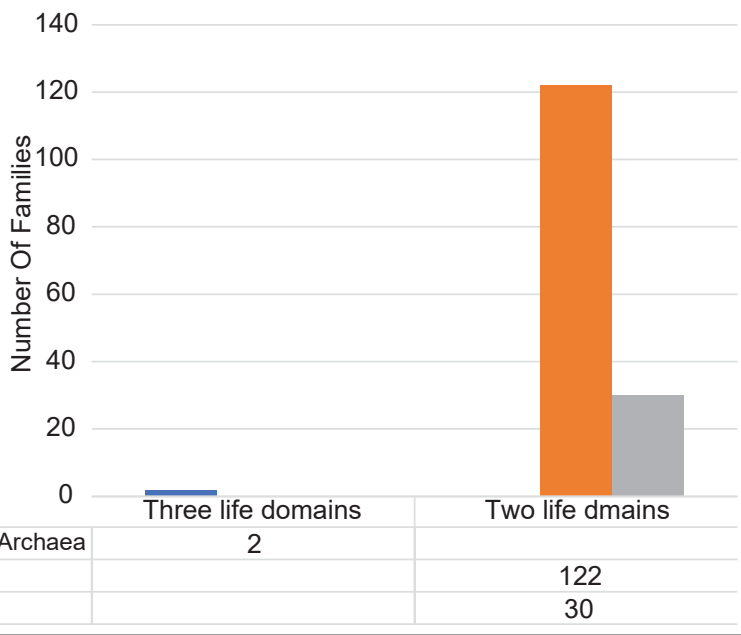

C

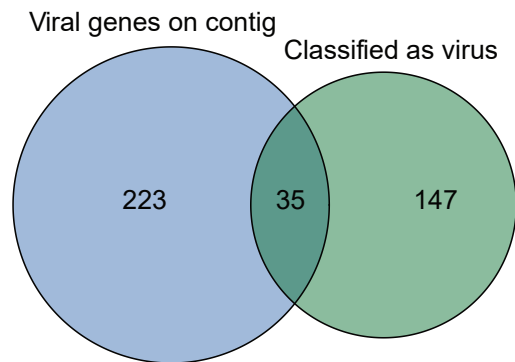

Supplement: NIHMS1536786-supplement-Supplemental_Figure_6.pdf [file NIHMS1536786-supplement-Supplemental_Figure_6.pdf]
